# Supplementary material
Source: PubMed Central journal article supplement (PMC4179594)
Supplement: bi500654y_si_001.pdf [file bi500654y_si_001.pdf]

## Supporting Information

The semiquinone at the Q<sub>i</sub>-site of the *bc*<sub>1</sub> complex explored using HYSCORE spectroscopy and specific isotopic labeling of ubiquinone in *Rhodobacter sphaeroides* via <sup>13</sup>C methionine and construction of a methionine auxotroph

Sangjin Hong,<sup>§</sup> Wagner de Almeida,<sup>&</sup> Alexander T. Taguchi,<sup>¶</sup> Rimma I. Samoilova,<sup>Δ</sup> Robert B. Gennis,<sup>§</sup> Patrick J. O'Malley,<sup>&</sup> Sergei A. Dikanov,<sup>‡</sup> and Antony R. Crofts\*<sup>§</sup>

<sup>§</sup>*Department of Biochemistry, University of Illinois at Urbana-Champaign, Urbana, Illinois 61801, United States*

<sup>&</sup>*School of Chemistry, The University of Manchester, Manchester M13 9PL, U.K.*

<sup>¶</sup>*Center for Biophysics and Computational Biology, University of Illinois at Urbana-Champaign, Urbana, Illinois 61801, United States*

<sup>Δ</sup>*Voevodsky Institute of Chemical Kinetics & Combustions, Russian Academy of Sciences, Novosibirsk 630090, Russian Federation*

<sup>‡</sup>*Department of Veterinary Clinical Medicine, University of Illinois at Urbana-Champaign, Urbana, Illinois 61801, United States*

**Antimycin-sensitive SQ.** The generation of SQ at the Q<sub>i</sub>-site is inhibited by antimycin A, an inhibitor specific to the site. In the presence of antimycin, an antimycin-insensitive signal with similar line-shape but much lower amplitude was observed, the nature of which has not been characterized. In Fig. S1, the EPR spectra generated in the absence and presence of antimycin are shown for the preparation used for characterization of the antimycin-sensitive SQ species. Double-integration of the CW-spectra was used to quantify the relative occupancy. The spectra were obtained under conditions for maximal occupancy of SQ, the top of the bell-shaped curve in Fig. 2 of the main text, which shows the relative occupancy determined from the difference between the traces in the absence and presence of antimycin. In contrast to the well-defined bell-shaped curve characteristic of SQ species, the amplitude of the antimycin-insensitive component was (within the accuracy of measurement) constant over the range of the titration.

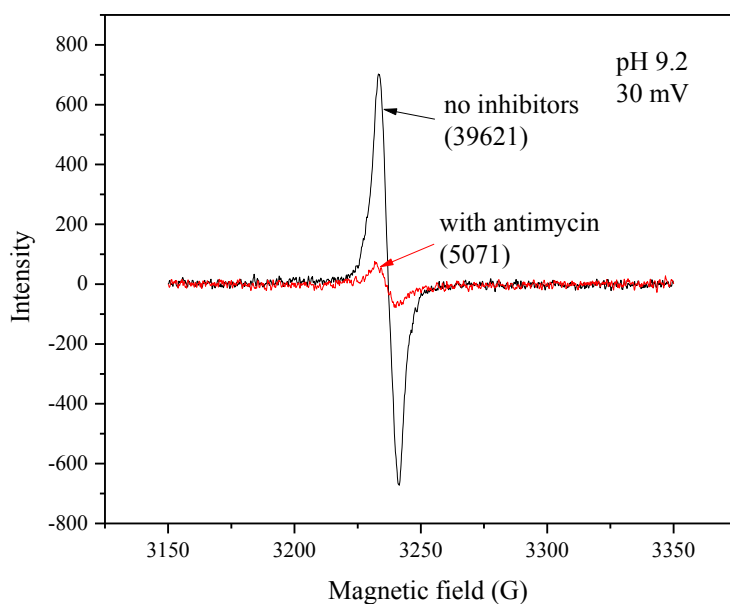

**Figure S1. Quantification of the CW-EPR spectra obtained in the absence and presence of antimycin.** Spectra obtained at the maximum of the titration curve for the antimycin sensitive component. Conditions were as in Fig. 2 of the text. The numbers in parentheses show values obtained by successive integration of the signal over the range 3225 to 3250 G, demonstrating that 87% of the signal in the absence of antimycin was sensitive to addition of antimycin. Integration was accomplished using the feature available in the OriginPro 9 software package (Origin Lab Corporation, Northampton, MA 01060, USA).

**Powder  $^{13}\text{C}$  ESEEM spectra.** The high-resolution pulsed EPR techniques, such as ESEEM and ENDOR, make use of the paramagnetic properties of the SQ intermediate, its interactions with nearby magnetic nuclei of the protein, the aqueous solvent, and the quinone molecule itself. 1D and 2D ESEEM, can be used to explore the fine-tuning of the environment, and the geometry of substituents and electronic structure of the SQ, via the isotropic and anisotropic hyperfine interactions with magnetic nuclei ( $^{13}\text{C}$  in this work).<sup>1</sup> ESEEM measures frequencies of nuclear transitions from nuclei interacting with an  $S=1/2$  electron spin of the SQ. There are only two transitions with frequencies  $\nu_\alpha$  and  $\nu_\beta$  for  $^{13}\text{C}$  with nuclear spin  $I=1/2$ , corresponding to two different states  $m_s=\pm 1/2$  of the SQ electron spin in a constant applied magnetic field. The value of the frequencies depends on the vector sum of the applied magnetic field and local magnetic field induced at the nucleus by the isotropic and anisotropic hyperfine interactions with the electron spin. In this work we used X-band EPR with microwave frequency  $\sim 9.7$  GHz and magnetic field  $\sim 350$  mT. The X-band EPR

spectrum of the SQ in frozen solutions is a single line with the width  $\sim 0.8$ - $1.0$  mT with unresolved hyperfine structure. This width is comparable to the excitation width of the EPR spectrum by microwave pulses. In this case, the pulses can be considered as giving a complete excitation of the powder EPR spectrum and thus the ESEEM spectra obtained are the powder-type spectra of nuclear frequencies with all different orientations of applied magnetic field relative to the principal axes of  $^{13}\text{C}$  hyperfine tensor(s). The frequencies of  $\nu_\alpha$  and  $\nu_\beta$  transitions vary between

$$\begin{aligned}\nu_{\alpha(\beta)\perp} &= |\nu_C + (-) A_\perp/2| \quad \text{and} \\ \nu_{\alpha(\beta)\parallel} &= |\nu_C + (-) A_\parallel/2|\end{aligned}\quad (1)$$

corresponding to the perpendicular and parallel orientations of the magnetic field and the unique axis of the axial hyperfine tensor ( $\nu_C$  is the Zeeman frequency of  $^{13}\text{C}$  in the applied magnetic field,  $A_\perp = |a - T|$  and  $A_\parallel = |a + 2T|$ ,  $a$  is the isotropic hyperfine constant, and the  $T$ -components of the anisotropic hyperfine tensor are  $(-T, -T, 2T)$ ). The principal values of the rhombic hyperfine tensor can be defined as follows:  $(-T(1 + \delta), -T(1 - \delta), 2T)$  with  $0 \leq \delta \leq 1$ , where  $\delta$  is a rhombic parameter.

In this work we used HYSORE because it provides better resolution of the extended lines of low intensity. The HYSORE experiment creates off-diagonal cross-peaks  $(\nu_\alpha, \nu_\beta)$  and  $(\nu_\beta, \nu_\alpha)$  from each  $I=1/2$  nucleus in the 2D spectrum. Powder HYSORE spectra of  $I = 1/2$  nuclei reveal, in the form of cross-ridges, the interdependence of  $\nu_\alpha$  and  $\nu_\beta$  in the same orientations (see Figure 1). The two coordinates of the arbitrary point at the cross-ridge, described in the first-order by the equation

$$\nu_{\alpha(\beta)} = |\nu_C + (-) A/2| \quad (2)$$

can be used for the first-order estimate of the corresponding hyperfine coupling constant  $A$ :

$$\nu_\alpha - \nu_\beta = A \quad (3)$$

Analysis of the ridges in  $(\nu_\alpha)^2$  vs.  $(\nu_\beta)^2$  coordinates allows for direct, simultaneous determination of the isotropic  $a$  and anisotropic  $T$  components of the hyperfine tensor as described below.<sup>2</sup>

**Analysis of  $^{13}\text{C}$  cross-peaks.** An analytical estimate of the  $^{13}\text{C}$  hyperfine tensors, i.e.  $a$  (isotropic coupling constant) and  $T$  (anisotropic coupling constant) was performed by plotting the HYSORE spectrum in  $(\nu_1)^2$  vs.  $(\nu_2)^2$  coordinates. By doing so, cross-peaks that are approximately axial appear as linear segments that can be fit to a linear regression. Intersection points of the linear fit with the line  $|\nu_1 \pm \nu_2| = 2\nu_C$  define the principal values of the hyperfine tensor.<sup>1,2</sup> There are two possible assignments to  $(\nu_{\alpha\perp}, \nu_{\beta\perp})$  or  $(\nu_{\alpha\parallel}, \nu_{\beta\parallel})$  for each crossing point and, consequently, two solutions, one for each assignment. The tensors obtained from the analysis of the SQ<sub>i</sub> spectra are summarized in Table S1. Uncertainty in

assignment of  $\nu_1$  to  $\nu_\alpha$  or  $\nu_\beta$  and, respectively,  $\nu_2$  to  $\nu_\beta$  or  $\nu_\alpha$ , allows alternate signs of  $a$  and  $T$  in both solutions.

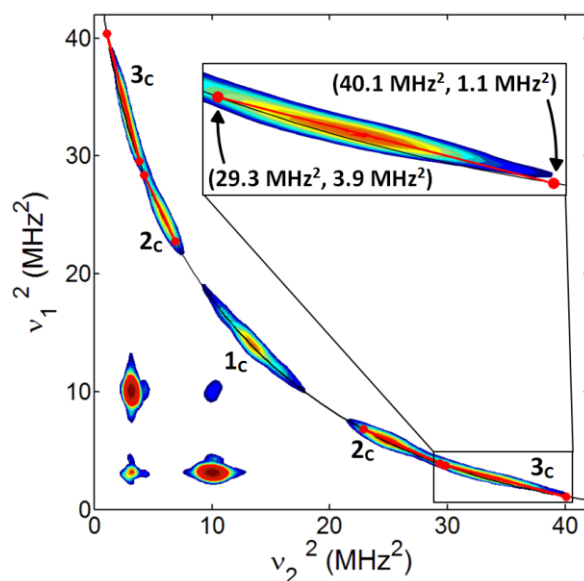

**Figure S2.** Contour presentation of the HYSORE spectra of  $SQ_i$  (Figure 3) in  $((\nu_1)^2$  vs.  $(\nu_2)^2$ ) coordinates. The black curve is defined by  $|\nu_1 + \nu_2| = 2\nu_c$ . The insert shows the linear regression fit for cross-peak  $3_c$  in greater detail.

**Table S1.** The  $^{13}\text{C}$  hyperfine tensors determined from the parameters of linear regression fits of the cross-peaks.

| Site    | Set   | Intersection ( $\text{MHz}^2$ ) | $(\nu_{\alpha\perp}, \nu_{\beta\perp})$ ,<br>MHz | $(\nu_{\alpha\parallel}, \nu_{\beta\parallel})$ ,<br>MHz | $(a, T)$ , MHz                |
|---------|-------|---------------------------------|--------------------------------------------------|----------------------------------------------------------|-------------------------------|
| $Q_A^a$ | $2_c$ | $(22.6 \pm 1.5, 6.9 \pm 0.8)$   | $(4.2, 3.2)$                                     | $(4.8, 2.6)$                                             | $(1.3 \pm 0.2, 0.4 \pm 0.1)$  |
|         |       | $(17.2 \pm 0.4, 10.5 \pm 0.3)$  | $(4.8, 2.6)$                                     | $(4.2, 3.2)$                                             | $(-1.7 \pm 0.2, 0.4 \pm 0.1)$ |
|         | $3_c$ | $(32.8 \pm 0.2, 2.8 \pm 0.1)$   | $(5.1, 2.3)$                                     | $(5.7, 1.8)$                                             | $(3.2 \pm 0.1, 0.4 \pm 0.1)$  |
|         |       | $(26.2 \pm 1.0, 5.2 \pm 0.4)$   | $(5.7, 1.7)$                                     | $(5.1, 2.3)$                                             | $(-3.6 \pm 0.1, 0.4 \pm 0.1)$ |
| $Q_B^a$ | $1_c$ | $(23.7 \pm 0.8, 6.4 \pm 0.4)$   | $(4.2, 3.2)$                                     | $(4.9, 2.5)$                                             | $(1.4 \pm 0.2, 0.5 \pm 0.1)$  |
|         |       | $(17.3 \pm 0.7, 10.4 \pm 0.6)$  | $(4.9, 2.5)$                                     | $(4.2, 3.2)$                                             | $(-1.9 \pm 0.2, 0.5 \pm 0.1)$ |
|         | $2_c$ | $(35.0 \pm 0.3, 2.2 \pm 0.1)$   | $(5.3, 2.1)$                                     | $(5.9, 1.5)$                                             | $(3.6 \pm 0.1, 0.4 \pm 0.1)$  |
|         |       | $(28.3 \pm 0.9, 4.3 \pm 0.4)$   | $(5.9, 1.5)$                                     | $(5.3, 2.1)$                                             | $(-4.0 \pm 0.1, 0.4 \pm 0.1)$ |
|         | $3_c$ | $(43.2 \pm 0.3, 0.7 \pm 0.1)$   | $(5.7, 1.7)$                                     | $(6.6, 0.8)$                                             | $(4.6 \pm 0.1, 0.6 \pm 0.1)$  |
|         |       | $(32.7 \pm 0.6, 2.8 \pm 0.2)$   | $(6.6, 0.8)$                                     | $(5.7, 1.7)$                                             | $(-5.2 \pm 0.1, 0.6 \pm 0.1)$ |
| $Q_i$   | $2_c$ | $(29.1 \pm 1.5, 4.0 \pm 0.5)$   | $(5.4, 2.0)$                                     | $(4.8, 2.6)$                                             | $(2.6 \pm 0.1, 0.4 \pm 0.1)$  |
|         |       | $(22.8 \pm 0.1, 6.8 \pm 0.1)$   | $(4.8, 2.6)$                                     | $(5.4, 2.0)$                                             | $(-3.0 \pm 0.2, 0.4 \pm 0.1)$ |
|         | $3_c$ | $(40.2 \pm 0.3, 1.1 \pm 0.1)$   | $(6.3, 1.0)$                                     | $(5.4, 2.0)$                                             | $(4.1 \pm 0.1, 0.6 \pm 0.1)$  |
|         |       | $(29.4 \pm 0.2, 3.8 \pm 0.1)$   | $(5.4, 2.0)$                                     | $(6.3, 1.0)$                                             | $(-4.7 \pm 0.1, 0.6 \pm 0.1)$ |

<sup>a</sup>from ref. 3

**Table S2.**  $^{13}\text{C}$  hyperfine tensors determined from the spectral simulations.

| Site                        | Set            | $a$ (MHz)      | $T$ (MHz)                   | Peak Max <sup>a</sup> | Peak Max <sup>b</sup> |
|-----------------------------|----------------|----------------|-----------------------------|-----------------------|-----------------------|
| Q <sub>A</sub> <sup>c</sup> | 1 <sub>C</sub> | 0              | 0.4                         | (3.7,3.7)             | (3.7, 3.7)            |
|                             | 2 <sub>C</sub> | 1.3            | 0.5                         | (4.3,3.1)             | (4.3, 3.1)            |
|                             |                | -1.7           | 0.4                         | (4.5,2.9)             |                       |
|                             | 3 <sub>C</sub> | 3.2            | 0.4                         | (5.3,2.1)             | (5.5, 1.9)            |
|                             |                | -3.6           | 0.4                         | (5.5,1.9)             |                       |
| Q <sub>B</sub> <sup>c</sup> | 1 <sub>C</sub> | 1.5            | 0.4 ( $\delta=0.8$ )        | (4.5,2.9)             | (4.5, 3.0)            |
|                             |                | 1.4            | 0.5                         | (4.3,3.1)             |                       |
|                             |                | -1.9           | 0.5                         | (4.6,2.7)             |                       |
|                             | 2 <sub>C</sub> | -3.9           | 0.4                         | (5.6,1.8)             | (5.7, 1.7)            |
|                             |                | 3.6            | 0.4                         | (5.5, 1.9)            |                       |
|                             |                | -4.0           | 0.4                         | (5.8,1.6)             |                       |
|                             | 3 <sub>C</sub> | 4.7            | 0.4 ( $\delta=0.3$ )        | (6.0,1.4)             | (6.0, 1.5)            |
|                             |                | 4.6            | 0.6                         | (5.8,1.6)             |                       |
|                             |                | -5.2           | 0.6                         | (6.2,1.2)             |                       |
|                             | Q <sub>i</sub> | 1 <sub>C</sub> | 0.2 (60%)<br>&<br>1.1 (40%) | 0.5 ( $\delta=0.4$ )  | (3.7, 3.7)            |
| 2 <sub>C</sub>              |                | 2.5            | 0.5 ( $\delta=0.4$ )        | (5.0, 2.4)            | (5.0, 2.4)            |
| 3 <sub>C</sub>              |                | -4.4           | 0.6 ( $\delta=0.3$ )        | (5.8, 1.6)            | (5.8, 1.6)            |

<sup>a</sup> Peak Maximum from simulation; <sup>b</sup> Peak Maximum from experimental data; <sup>c</sup> from ref. 3.

### Simulated spectra

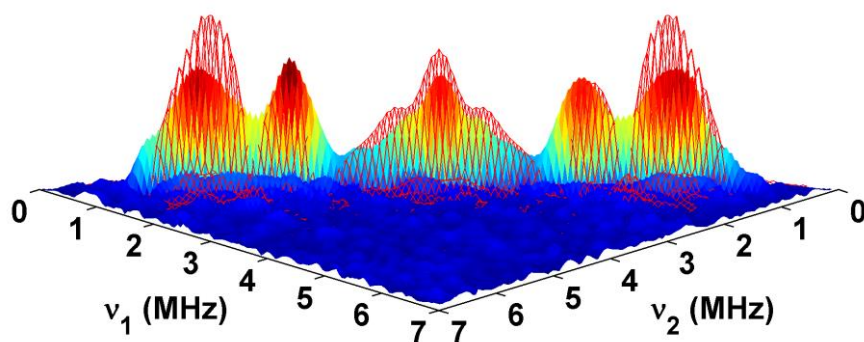

**Figure S3 (A).** The <sup>13</sup>C-Q<sub>i</sub> spectrum was simulated with the same sign solution axial tensors from the squared-frequency analysis for 2<sub>C</sub> and 3<sub>C</sub>. Simulation parameters: [ $a_1 = 0.2$  (60%) & 1.1 (40%),  $T_1 = 0.5$ ,  $\delta = 0.4$ ], [ $a_2 = 2.6$ ,  $T_2 = 0.4$ ], [ $a_3 = 4.1$ ,  $T_3 = 0.6$ ] MHz.

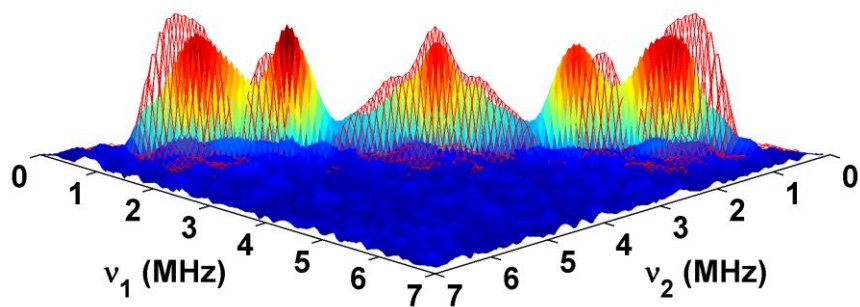

**Figure S3 (B).** The  $^{13}\text{C}$ - $Q_i$  spectrum was simulated with the opposite sign solution axial tensors from the squared-frequency analysis for  $2_C$  and  $3_C$ . Simulation parameters:  $[a_1 = 0.2$  (60%) &  $1.1$  (40%),  $T_1 = 0.5$ ,  $\delta = 0.4]$ ,  $[a_2 = -3.0$ ,  $T_2 = 0.4]$ ,  $[a_3 = -4.7$ ,  $T_3 = 0.6]$  MHz.

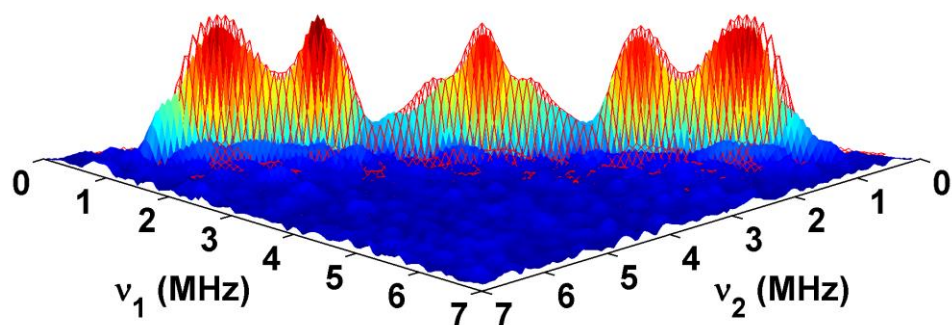

**Figure S3 (C).** The  $^{13}\text{C}$ - $Q_i$  spectrum was simulated with the rhombic tensors. Simulation parameters:  $[a_1 = 0.2$  (60%) &  $1.1$  (40%),  $T_1 = 0.5$ ,  $\delta = 0.4]$ ,  $[a_2 = 2.5$ ,  $T_2 = 0.5$ ,  $\delta = 0.4]$ ,  $[a_3 = -4.4$ ,  $T_3 = 0.6$ ,  $\delta = 0.3]$  MHz.

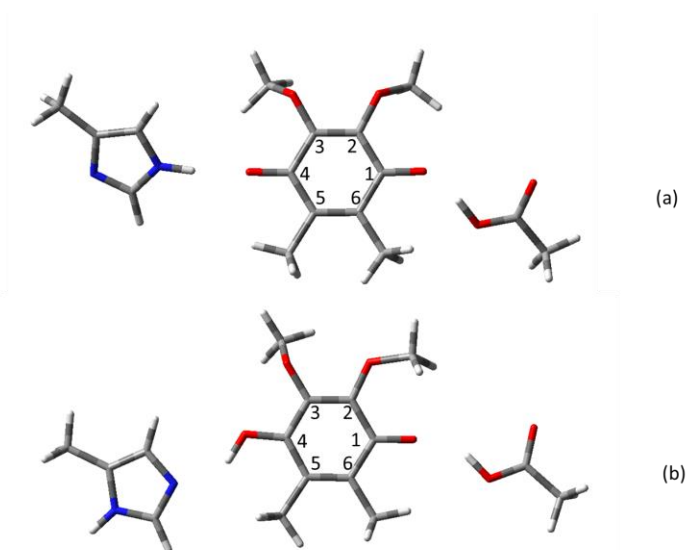

**Figure S4.** Optimised models of SQ in the  $Q_i$  active site for deprotonated H201  $N_8$  (top) and protonated H201  $N_8$  (bottom). Starting geometry used was taken from chain C of the 1PP9.pdb file.

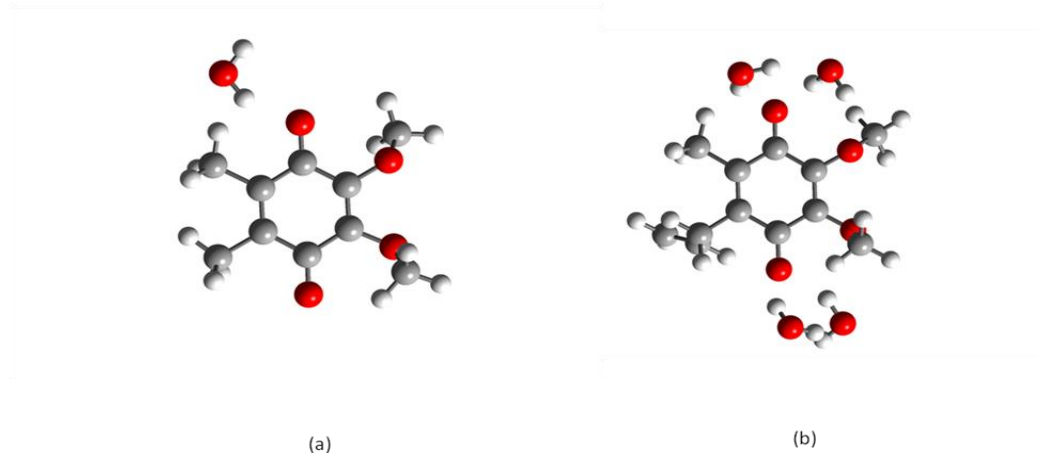

**Figure S5.** Models used for (a)  $SQ_{M2}$  and (b)  $SQ_{M1}$ .

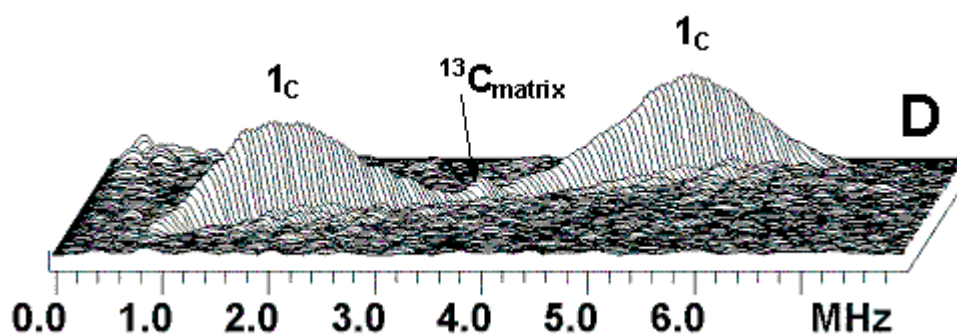

**Figure S6.** Stacked (D) presentations of the HYSCORE spectrum of the UQ-8 anion-radical with  $^{13}C$  labeled methyl and methoxy groups in frozen isopropanol solution (magnetic field 345.1 mT, time between first and second pulses  $\tau=136$  ns, microwave frequency 9.682 GHz (isopropanol)). From ref.4.

#### References.

1. Dikanov, S. A. (2013) Resolving protein-semiquinone interactions by two-dimensional ESEEM spectroscopy. *Electron Paramagn. Resonan.* 23, 103–179.

2. Dikanov, S. A., and Bowman, M. K. (1995) Cross-peak lineshape of two-dimensional ESEEM spectra in disordered  $S=1/2$ ,  $I=1/2$  spin system. *J. Magn. Reson., Ser. A* 116, 125–128.
3. Taguchi, A. T., O'Malley, P. J., Wraight, C. A., and Dikanov, S. A. (2013) Conformational differences between the methoxy groups of  $Q_A$  and  $Q_B$  site ubisemiquinones in bacterial reaction centers: A key role for methoxy group orientation in modulating ubiquinone redox potential. *Biochemistry* 52, 4648-4655.
4. Lin, M. T., Shubin, A. A., Samoilova, R. I., Narasimhulu, K. V., Baldansuren, A., Gennis, R. B., and Dikanov, S. A. (2011) Exploring by pulsed EPR the electronic structure of ubisemiquinone bound at the  $Q_H$  site of cytochrome  $bo_3$  from *Escherichia coli* with *in vivo*  $^{13}\text{C}$ -labeled methyl and methoxy substituents. *J. Biol. Chem.* 286, 10105-10114.
